# Supplementary material
Source: publisher figshare collection journal article supplement (https://acs.figshare.com/ndownloader/files/5204878)
Supplement: Supplementary file 1 [file 5204878]

# SUPPORTING INFORMATION

## Insights into $\text{BaTi}_{1-y}\text{Zr}_y\text{O}_3$ ( $0 \leq y \leq 1$ ) Synthesis under Supercritical Fluid Conditions

Gilles Philippot<sup>††</sup>, Espen D. Boejesen<sup>†</sup>, Catherine Elissalde<sup>†</sup>, Mario Maglione<sup>†</sup>, Cyril Aymonier<sup>†\*</sup> and Bo B. Iversen<sup>†\*\*</sup>

<sup>†</sup>Center for Materials Crystallography, Department of Chemistry and iNANO, Aarhus University, Aarhus 8000, Denmark

<sup>†</sup>CNRS, Univ. Bordeaux, ICMCB, UPR 9048, F-33600 Pessac, France

### Calculation of crystallite sizes

The Thomson Cox Hastings – pseudo Voigt approximation was used to model the powder diffraction patterns. Thus, the profiles are described by a convolution of Gaussian (normal distribution,  $G(x)$ ) and Lorentzian (Cauchy distribution,  $L(x)$ ) components. When normalizing these components ( $L'(x)$  and  $G'(x)$ ) we obtain the information regarding the peaks broadening (FWHM or  $H'$ ). Each distribution have a different FWHM:  $H_G$  and  $H_L$  and the shape of the Voigt function depend on the relative importance of both.

$$V(x) = V(x, H_G, H_L)$$

The pseudo Voigt function,  $pV(x)$ , approximates the Voigt function where  $H_L$  and  $H_G$  are replaced by the pair ( $\eta$ ,  $H$ ).

$$pV(x) = \eta L'(x) + (1 - \eta)G'(x) \text{ with } 0 \leq \eta \leq 1$$

This equation can then be numerically calculated as:

$$H = (H_G^5 + 2.69269 \cdot H_G^4 \cdot H_L + 2.48243 \cdot H_G^3 \cdot H_L^2 + 4.47163 \cdot H_G^2 \cdot H_L^3 + 0.07842 \cdot H_G \cdot H_L^4 + H_L^5)^{1/5}$$

With

$$H_G = \frac{\sqrt{I_G}}{\cos(\theta)}$$

$$H_L = \frac{Y}{\cos(\theta)}$$

Leading to

$$H = \frac{1}{\cos(\theta)} \left( \sqrt{I_G}^5 + 2.69269 \cdot \sqrt{I_G}^4 \cdot Y + 2.48243 \cdot \sqrt{I_G}^3 \cdot Y^2 + 4.47163 \cdot \sqrt{I_G}^2 \cdot Y^3 + 0.07842 \cdot \sqrt{I_G} \cdot Y^4 + Y^5 \right)^{1/5}$$

Which can be then inserted in the Scherrer equation

$$\langle D \rangle = \frac{K \cdot \lambda}{H \cdot \cos(\theta)}$$

The uncertainties ( $\sigma_D$ ) were calculated with the Equations (1) & (2) where  $\sigma_{I_G}$  and  $\sigma_Y$  are the uncertainties on  $I_G$  and  $Y$  determined through the refinement. In all the results the errors on size calculations were lower than 0.5 nm showing data of high quality:

$$\sigma_D = \left( \frac{0.94\lambda}{H^2} \right) \cdot \sigma_H \quad (1)$$

$$\sigma_H = \frac{\pi}{180} \cdot \sqrt{\frac{Y}{16 I_G^{2/3}} \cdot \sigma_{I_G}^2 + \frac{\sigma_{I_G}}{4 Y} \cdot \sigma_Y^2} \quad (2)$$

**Figure S1 : Variation of the BTZ mean nanocrystals size, together with their size distributions, determined from TEM pictures with more than 150 nanocrystals for each composition (reprinted from Philippot et al. Ref [2] Copyright @ (2015), Elsevier)**

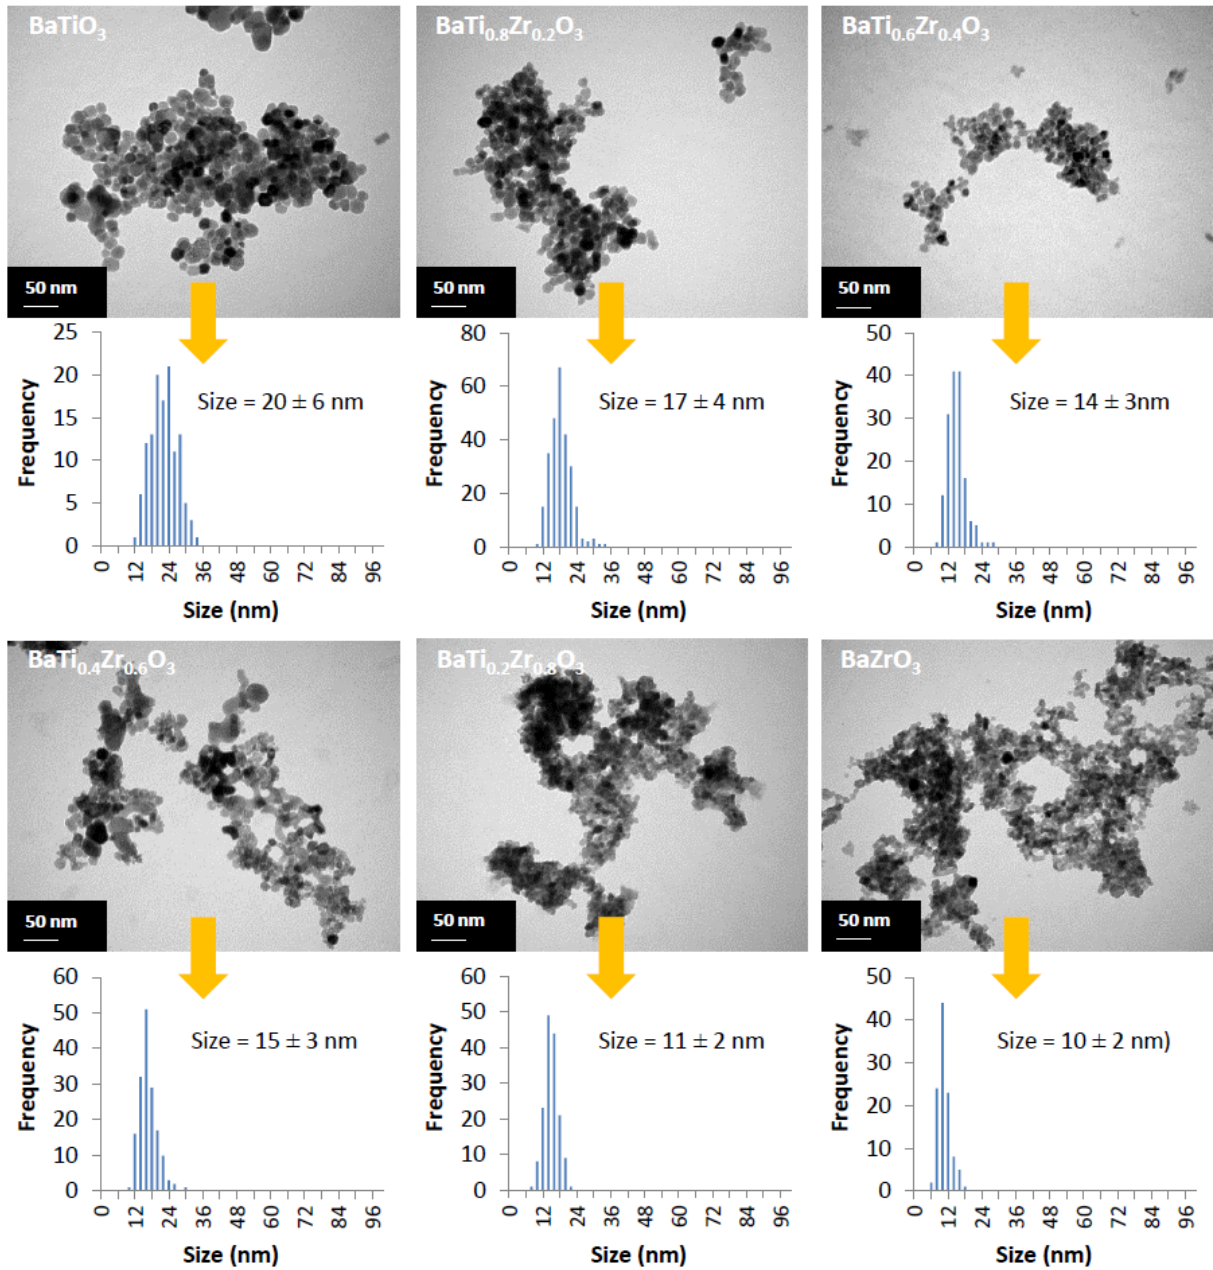

**Figure S2 :In situ: Variation of the normalized crystallite size and normalized scale factor with time for  $\text{BaTiO}_3$ ,  $\text{BaTi}_{0.85}\text{Zr}_{0.15}\text{O}_3$  and  $\text{BaTi}_{0.70}\text{Zr}_{0.30}\text{O}_3$  syntheses at  $400^\circ\text{C}$  and precursor concentration of  $0.2\text{M}$**

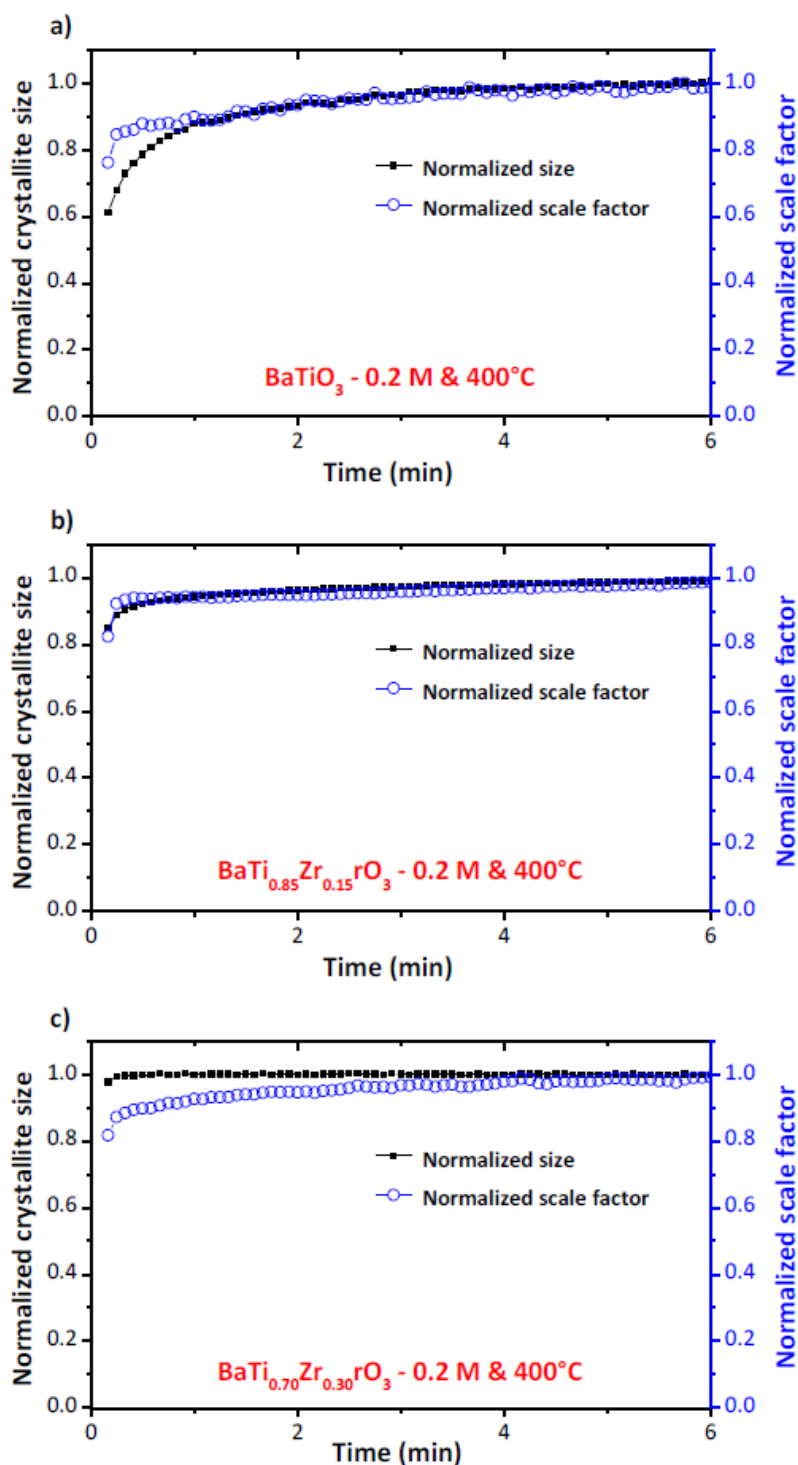

**Figure S3 : Variation of the WAXS patterns ( $\lambda \approx 0.99361 \text{ \AA}$ ) during the synthesis of  $\text{BaTi}_{0.2}\text{Zr}_{0.8}\text{O}_3$  crystallites at different synthesis temperatures:  $400^\circ\text{C}$  and  $150^\circ\text{C}$  with a zoom around  $39^\circ$ .**

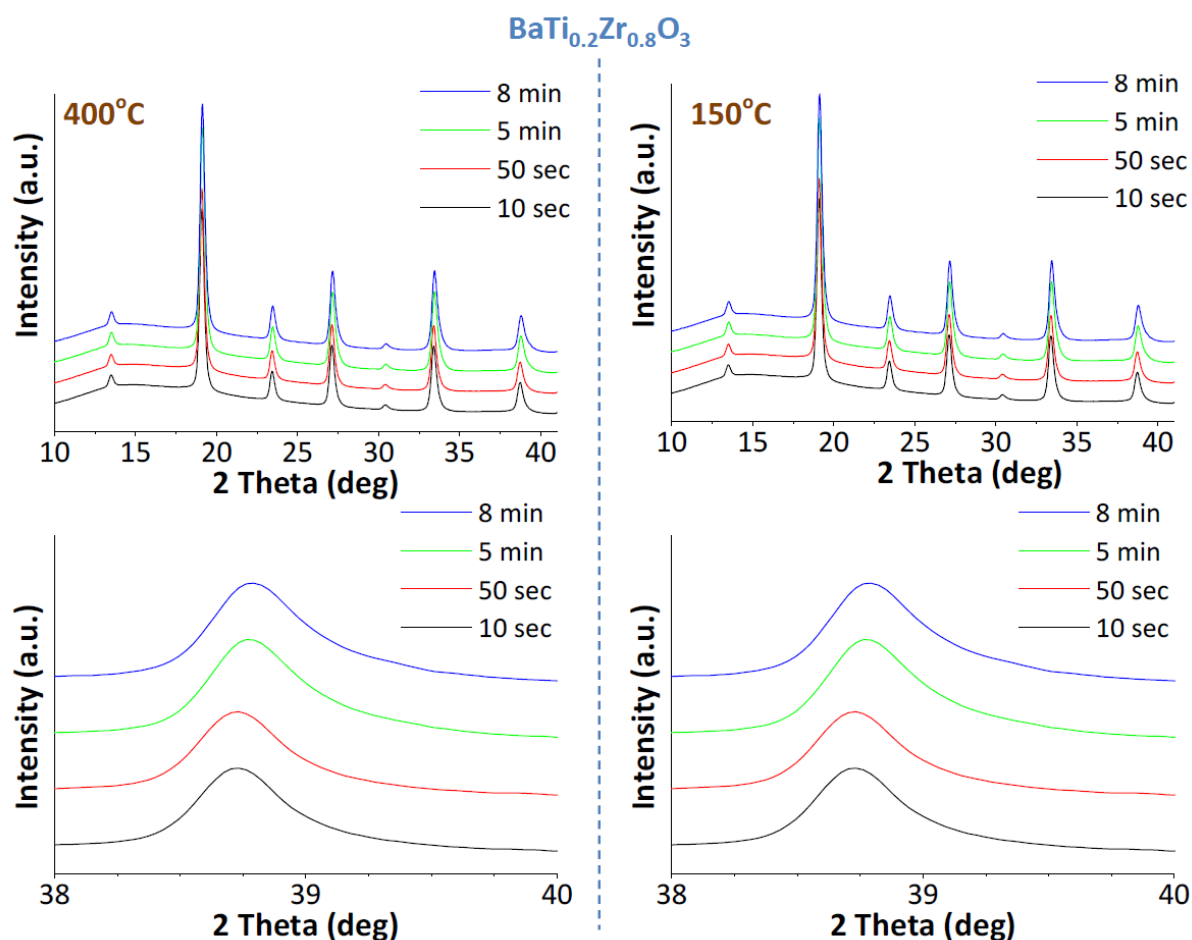

Here the background is higher than for the experiment with  $y = 0.6$ , the zirconium amount being higher, the quantity of unreacted precursor, even at  $400^\circ\text{C}$ , might be higher due to the lower overall reactivity.

**Figure S4 :Ex situ: visualization of the microstrain effect on PXRD refinement of the  $\text{BaTi}_{0.4}\text{Zr}_{0.6}\text{O}_3$  sample**

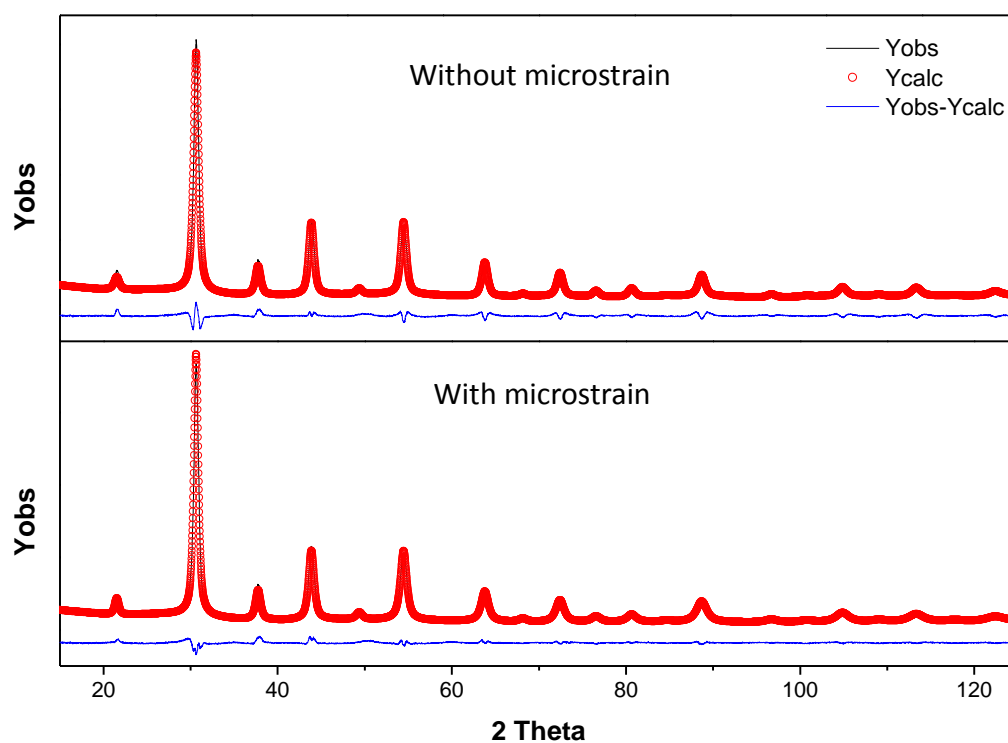

This figure presents the visualization of the microstrain effect on the PXRD refinement of the  $\text{BaTi}_{0.4}\text{Zr}_{0.6}\text{O}_3$  produced with the flow reactor. There we can see that the modeled pattern including a microstrain parameter presents a better fit to the experimental data than the model without microstrain.

**Table T1 : Results of ICP measurements on the BTZ powders produced with the flow reactor**

|                                                        | Ti            |          |             |          | Zr            |          |             |          | Zr/(Zr+Ti)  |             |             |
|--------------------------------------------------------|---------------|----------|-------------|----------|---------------|----------|-------------|----------|-------------|-------------|-------------|
|                                                        | Concentration |          | Uncertainty |          | Concentration |          | Uncertainty |          | Calculated  |             | Target      |
|                                                        | mg/L          | mol/L    | mg/L        | mol/L    | mg/L          | mol/L    | mg/L        | mol/L    | Value       | Uncertainty |             |
| BaTi <sub>0.85</sub> Zr <sub>0.15</sub> O <sub>3</sub> | 16.45         | 3.44E-03 | 0.34        | 7.10E-05 | 6.03          | 6.61E-04 | 1.19        | 1.30E-04 | <b>0.16</b> | 0.03        | <b>0.15</b> |
| BaTi <sub>0.70</sub> Zr <sub>0.30</sub> O <sub>3</sub> | 15.91         | 3.32E-03 | 0.34        | 7.10E-05 | 14.81         | 1.62E-03 | 1.19        | 1.30E-04 | <b>0.33</b> | 0.02        | <b>0.30</b> |
| BaTi <sub>0.50</sub> Zr <sub>0.50</sub> O <sub>3</sub> | 10.47         | 2.19E-03 | 0.34        | 7.10E-05 | 17.63         | 1.93E-03 | 1.19        | 1.30E-04 | <b>0.47</b> | 0.02        | <b>0.50</b> |
| BaTi <sub>0.40</sub> Zr <sub>0.60</sub> O <sub>3</sub> | 8.78          | 1.83E-03 | 0.34        | 7.10E-05 | 21.94         | 2.41E-03 | 1.19        | 1.30E-04 | <b>0.57</b> | 0.02        | <b>0.60</b> |
| BaTi <sub>0.30</sub> Zr <sub>0.70</sub> O <sub>3</sub> | 7.58          | 1.58E-03 | 0.34        | 7.10E-05 | 29.27         | 3.21E-03 | 1.19        | 1.30E-04 | <b>0.67</b> | 0.02        | <b>0.70</b> |
| BaTi <sub>0.20</sub> Zr <sub>0.80</sub> O <sub>3</sub> | 4.54          | 9.48E-04 | 0.34        | 7.10E-05 | 29.2          | 3.20E-03 | 1.19        | 1.30E-04 | <b>0.77</b> | 0.02        | <b>0.80</b> |
| BaTi <sub>0.10</sub> Zr <sub>0.90</sub> O <sub>3</sub> | 2.52          | 5.26E-04 | 0.34        | 7.10E-05 | 30.18         | 3.31E-03 | 1.19        | 1.30E-04 | <b>0.86</b> | 0.02        | <b>0.90</b> |

**Table T2 : In situ: visualization of the 2 phases impact on the refinement in the case of BaTi<sub>0.4</sub>Zr<sub>0.6</sub>O<sub>3</sub> at 400°C**

|                                | 10 seconds |         |                | 8 minutes |         |             |
|--------------------------------|------------|---------|----------------|-----------|---------|-------------|
|                                | 2 phases   |         | 1 phase        | 2 phases  |         | 1 phase     |
|                                | Phase 1    | Phase 2 |                | Phase 1   | Phase 2 |             |
| <b>R-Bragg (%)</b>             | 3.62       | 3.39    | <b>8.11</b>    | 3.43      | 4.09    | <b>1.60</b> |
| <b>B<sub>iso</sub> Zr/Ti</b>   | 3.32       | 3.81    | 3.02           | 3.6       | 3.6     | 2.95        |
| <b>Unit cell (Å)</b>           | 4.14       | 4.19    | 4.17           | 4.14      | 4.16    | 4.15        |
| <b>Scale (10<sup>-4</sup>)</b> | 2.9        | 4.9     | 7.9            | 5.1       | 7.1     | 12.3        |
| <b>Y</b>                       | 0.205      | 0.275   | 0.271          | 0.223     | 0.275   | 0.247       |
| <b>I<sub>G</sub></b>           | 0.0819     | /       | <b>-0.0202</b> | 0.0163    | /       | 0.0067      |
| <b>X</b>                       | 0.346      | 1.184   | 4.59           | 1.144     | 1.199   | 1.998       |

This table presents a comparison of the refined parameters for the BaTi<sub>0.4</sub>Zr<sub>0.6</sub>O<sub>3</sub> synthesis at 400°C. At the earliest stage of the synthesis (10 seconds), the PXRD fit shows unphysical negative values making it unrealistic, which is not the case for the 2 phases model. It is interesting to note that the R-Bragg factor is also high for the 1 phase case compare to the 2 phases one. After 8 minutes, both model are realistic but, the single phase one now presents even a lower R-Bragg factor. This one phase model is the one used to refine PXRD samples produced with the flow setup. This observation confirms a similar quality between a 8 minutes batch synthesis with a 50 seconds residence time flow one, both being performed at 400°C.

## References

- [1] G. Philippot, K. M. Ø. Jensen, M. Christensen, C. Elissalde, M. Maglione, B. B. Iversen, and C. Aymonier, "Coupling in situ synchrotron radiation with ex situ spectroscopy characterizations to study the formation of Ba1-xSrxTiO3 nanoparticles in supercritical fluids," *J. Supercrit. Fluids*, vol. 87, pp. 111–117, Mar. 2014.
- [2] G. Philippot, M. Albino, U.-C. Chung, M. Josse, C. Elissalde, M. Maglione, and C. Aymonier, "Continuous BaTi1-yZryO3 (0≤y≤1) nanocrystals synthesis in supercritical fluids for nanostructured lead-free ferroelectric ceramics," *Mater. Des.*, vol. 86, pp. 354–360, 2015.
